# Supplementary material
Source: PubMed Central journal article supplement (PMC7221865)
Supplement: jamasurg-155-600-s001.pdf [file jamasurg-155-600-s001.pdf]

## Supplementary Online Content

von Strauss und Torney M, Moffa G, Kaech M, et al. Risk of emergency surgery or death after initial nonoperative management of complicated diverticulitis in Scotland and Switzerland. *JAMA Surg*. Published online May 13, 2020.  
doi:10.1001/jamasurg.2020.0757

**eTable 1.** ICD Diverticulitis Codes

**eTable 2.** Additional ICD Diverticulitis Codes for Combination of Complication as Main Diagnosis and Diverticulitis Code (According eTable 1)

**eTable 3.** Hospital Characteristics and Expertise of All Hospitals With Diverticulitis Cases, by Country

**eTable 4.** Annual Unadjusted Incidence Rates of Complicated and Uncomplicated Diverticulitis From 2005 to 2015 in Switzerland and Scotland

**eTable 5.** Readmissions in Switzerland and Scotland After an Initial Episode of Successful Conservative Management of Diverticulitis Stratified by a later Event of Emergency Surgery or Death

**eTable 6.** Marginal Model for Problematic Recurrence Leading to Death, in Patients After a First Conservatively Managed Episode of Complicated Diverticulitis in the Swiss and Scottish Health Care System

**eTable 7.** a) Multiple Logistic Regression for Problematic Recurrence With Scotland Instead of Switzerland as Reference Level, and Including Interaction Terms; b) Model Accounting for Hospital Clustering, With Scotland as Reference Level, and Including Interaction Terms; c) Multiple Logistic Regression and GEE for Recurrence With Death, Using Scotland as Reference Level, and Including Interaction Terms; d) Multiple Logistic Regression and GEE for Recurrence With Death, Using Scotland as Reference Level, and Including Interaction Terms Accounting for Hospital Clustering

This supplementary material has been provided by the authors to give readers additional information about their work.

**eTable 1. ICD Diverticulitis Codes**

| <b>diverticulitis_ICD</b> | <b>type</b> | <b>type_char</b>    | <b>note</b> |
|---------------------------|-------------|---------------------|-------------|
| K57                       | 1           | uncomplicated       |             |
| K570                      | 2           | other (small bowel) | exclude     |
| K5700                     | 2           | other (small bowel) | exclude     |
| K5701                     | 2           | other (small bowel) | exclude     |
| K5702                     | 2           | other (small bowel) | exclude     |
| K5703                     | 2           | other (small bowel) | exclude     |
| K571                      | 2           | other (small bowel) | exclude     |
| K5710                     | 2           | other (small bowel) | exclude     |
| K5711                     | 2           | other (small bowel) | exclude     |
| K5712                     | 2           | other (small bowel) | exclude     |
| K5713                     | 2           | other (small bowel) | exclude     |
| K572                      | 3           | complicated         |             |
| K5720                     | 3           | complicated         |             |
| K5721                     | 3           | complicated         |             |
| K5722                     | 3           | complicated         |             |
| K5723                     | 3           | complicated         |             |
| K573                      | 1           | uncomplicated       |             |
| K5730                     | 1           | uncomplicated       |             |
| K5731                     | 1           | uncomplicated       |             |
| K5732                     | 1           | uncomplicated       |             |
| K5733                     | 1           | uncomplicated       |             |
| K574                      | 3           | complicated         |             |
| K5740                     | 3           | complicated         |             |
| K5741                     | 3           | complicated         |             |
| K5742                     | 3           | complicated         |             |
| K5743                     | 3           | complicated         |             |
| K575                      | 1           | uncomplicated       |             |
| K5750                     | 1           | uncomplicated       |             |
| K5751                     | 1           | uncomplicated       |             |
| K5752                     | 1           | uncomplicated       |             |
| K5753                     | 1           | uncomplicated       |             |
| K578                      | 3           | complicated         |             |
| K5780                     | 3           | complicated         |             |
| K5781                     | 3           | complicated         |             |
| K5782                     | 3           | complicated         |             |
| K5783                     | 3           | complicated         |             |
| K579                      | 1           | uncomplicated       |             |
| K5790                     | 1           | uncomplicated       |             |
| K5791                     | 1           | uncomplicated       |             |
| K5792                     | 1           | uncomplicated       |             |
| K5793                     | 1           | uncomplicated       |             |

**eTable 2.** Additional ICD Diverticulitis Codes for Combination of Complication as Main Diagnosis and Diverticulitis Code (According eTable 1)

| main diagnosis_text                           | main_diagnosis_ICD | 1st_secondary_diagnosis_ICD                                         | OTHER_CONDITION_1                                                   | type | type_char   | note_1          |
|-----------------------------------------------|--------------------|---------------------------------------------------------------------|---------------------------------------------------------------------|------|-------------|-----------------|
| Intestinal obstruction                        | K56                | any diverticulitis code according file "jDiverticulitis_types.xlsx" | any diverticulitis code according file "jDiverticulitis_types.xlsx" | 3    | complicated | obstruction     |
| Paralytic ileus                               | K560               | any diverticulitis code according file "jDiverticulitis_types.xlsx" | any diverticulitis code according file "jDiverticulitis_types.xlsx" | 3    | complicated | obstruction     |
| Other impaction of intestine                  | K564               | any diverticulitis code according file "jDiverticulitis_types.xlsx" | any diverticulitis code according file "jDiverticulitis_types.xlsx" | 3    | complicated | obstruction     |
| Intestinal adhesions [bands] with obstruction | K565               | any diverticulitis code according file "jDiverticulitis_types.xlsx" | any diverticulitis code according file "jDiverticulitis_types.xlsx" | 3    | complicated | obstruction     |
| Other and unspecified intestinal obstruction  | K566               | any diverticulitis code according file "jDiverticulitis_types.xlsx" | any diverticulitis code according file "jDiverticulitis_types.xlsx" | 3    | complicated | obstruction     |
| Ileus, unspecified                            | K567               | any diverticulitis code according file "jDiverticulitis_types.xlsx" | any diverticulitis code according file "jDiverticulitis_types.xlsx" | 3    | complicated | obstruction     |
| Abscess of intestine                          | K63                | any diverticulitis code according file "jDiverticulitis_types.xlsx" | any diverticulitis code according file "jDiverticulitis_types.xlsx" | 3    | complicated | abscess/fistula |
| Abscess of intestine                          | K630               | any diverticulitis code according file "jDiverticulitis_types.xlsx" | any diverticulitis code according file "jDiverticulitis_types.xlsx" | 3    | complicated | abscess/fistula |
| Perforation of intestine                      | K631               | any diverticulitis code according file "jDiverticulitis_types.xlsx" | any diverticulitis code according file "jDiverticulitis_types.xlsx" | 3    | complicated | abscess/fistula |
| Fistula of intestine                          | K632               | any diverticulitis code according file "jDiverticulitis_types.xlsx" | any diverticulitis code according file "jDiverticulitis_types.xlsx" | 3    | complicated | abscess/fistula |
| Other specified diseases of intestine         | K638               | any diverticulitis code according file "jDiverticulitis_types.xlsx" | any diverticulitis code according file "jDiverticulitis_types.xlsx" | 3    | complicated | abscess/fistula |
| Disease of intestine, unspecified             | K639               | any diverticulitis code according file "jDiverticulitis_types.xlsx" | any diverticulitis code according file "jDiverticulitis_types.xlsx" | 3    | complicated | abscess/fistula |
| Fistula of vagina to large intestine          | N823               | any diverticulitis code according file "jDiverticulitis_types.xlsx" | any diverticulitis code according file "jDiverticulitis_types.xlsx" | 3    | complicated | abscess/fistula |

|                                                    |       |                                                                     |                                                                     |   |             |                 |
|----------------------------------------------------|-------|---------------------------------------------------------------------|---------------------------------------------------------------------|---|-------------|-----------------|
| Other female intestinal-genital tract fistulae     | N824  | any diverticulitis code according file "jDiverticulitis_types.xlsx" | any diverticulitis code according file "jDiverticulitis_types.xlsx" | 3 | complicated | abscess/fistula |
| Peritonitis                                        | K65   | any diverticulitis code according file "jDiverticulitis_types.xlsx" | any diverticulitis code according file "jDiverticulitis_types.xlsx" | 3 | complicated | Peritonitis     |
| Acute peritonitis                                  | K650  | any diverticulitis code according file "jDiverticulitis_types.xlsx" | any diverticulitis code according file "jDiverticulitis_types.xlsx" | 3 | complicated | Peritonitis     |
| Other peritonitis                                  | K658  | any diverticulitis code according file "jDiverticulitis_types.xlsx" | any diverticulitis code according file "jDiverticulitis_types.xlsx" | 3 | complicated | Peritonitis     |
| Peritonitis, unspecified                           | K659  | any diverticulitis code according file "jDiverticulitis_types.xlsx" | any diverticulitis code according file "jDiverticulitis_types.xlsx" | 3 | complicated | Peritonitis     |
| Intra-abdominal and pelvic swelling, mass and lump | R190  | any diverticulitis code according file "jDiverticulitis_types.xlsx" | any diverticulitis code according file "jDiverticulitis_types.xlsx" | 3 | complicated | abdominal mass  |
| Haemorrhage of anus and rectum                     | K625  | any diverticulitis code according file "jDiverticulitis_types.xlsx" | any diverticulitis code according file "jDiverticulitis_types.xlsx" | 3 | complicated | hemorrhage      |
| Melaena                                            | K921  | any diverticulitis code according file "jDiverticulitis_types.xlsx" | any diverticulitis code according file "jDiverticulitis_types.xlsx" | 3 | complicated | hemorrhage      |
| Gastrointestinal haemorrhage, unspecified          | K922  | any diverticulitis code according file "jDiverticulitis_types.xlsx" | any diverticulitis code according file "jDiverticulitis_types.xlsx" | 3 | complicated | hemorrhage      |
| Hypovolemic Shock                                  | R57.1 | any diverticulitis code according file "jDiverticulitis_types.xlsx" | any diverticulitis code according file "jDiverticulitis_types.xlsx" | 3 | complicated | shock           |
| Septic shock                                       | R572  | any diverticulitis code according file "jDiverticulitis_types.xlsx" | any diverticulitis code according file "jDiverticulitis_types.xlsx" | 3 | complicated | shock           |
| Other shock                                        | R578  | any diverticulitis code according file "jDiverticulitis_types.xlsx" | any diverticulitis code according file "jDiverticulitis_types.xlsx" | 3 | complicated | shock           |
| Shock, unspecified                                 | R579  | any diverticulitis code according file "jDiverticulitis_types.xlsx" | any diverticulitis code according file "jDiverticulitis_types.xlsx" | 3 | complicated | shock           |

**eTable 3.** Hospital Characteristics and Expertise of All Hospitals With Diverticulitis Cases, by Country

Hospitals are defined as medical centers if they handle on average more than 7500 cases a year, and they are classified at high expertise for diverticulitis if they handle on average more than 100 diverticulitis cases per year.

| <b>Baseline characteristics</b> | <b>Switzerland (n=163)</b> | <b>Scotland (n=64)</b> | <b>Both (n=227)</b> |
|---------------------------------|----------------------------|------------------------|---------------------|
| Hospital class                  |                            |                        |                     |
| Medical center                  | 77 (47.2%)                 | 32 (50%)               | 109 (48.0%)         |
| regional                        | 86 (52.8%)                 | 31 (48.4%)             | 117 (51.5%)         |
| Missing                         | NA                         | 1 (1.6%)               | 1 (0.44%)           |
| Hospital expertise              |                            |                        |                     |
| high                            | 60 (36.8%)                 | 24 (37.5%)             | 84 (37%)            |
| low                             | 103 (63.2%)                | 39 (60.9%)             | 142 (62.6%)         |
| Missing                         | NA                         | 1 (1.6%)               | 1 (0.4%)            |

**eTable 4.** Annual Unadjusted Incidence Rates of Complicated and Uncomplicated Diverticulitis From 2005 to 2015 in Switzerland and Scotland

| Year                             | Incidence of <i>uncomplicated</i> diverticulitis/10`000 inhabitants |          | Incidence of <i>complicated</i> diverticulitis/10`000 inhabitants |          |
|----------------------------------|---------------------------------------------------------------------|----------|-------------------------------------------------------------------|----------|
|                                  | Switzerland                                                         | Scotland | Switzerland                                                       | Scotland |
| 2005                             | 6.069                                                               | 4.094    | 2.850                                                             | 1.436    |
| 2006                             | 5.852                                                               | 3.698    | 2.842                                                             | 1.473    |
| 2007                             | 5.876                                                               | 3.720    | 3.021                                                             | 1.499    |
| 2008                             | 5.802                                                               | 3.548    | 3.002                                                             | 1.591    |
| 2009                             | 5.913                                                               | 3.280    | 2.859                                                             | 1.468    |
| 2010                             | 6.118                                                               | 3.411    | 2.683                                                             | 1.560    |
| 2011                             | 6.327                                                               | 3.625    | 2.692                                                             | 1.483    |
| 2012                             | 6.298                                                               | 3.627    | 2.804                                                             | 1.383    |
| 2013                             | 6.166                                                               | 3.686    | 2.648                                                             | 1.445    |
| 2014                             | 5.931                                                               | 3.605    | 2.666                                                             | 1.477    |
| 2015                             | 5.842                                                               | 3.583    | 2.776                                                             | 1.403    |
| Mean<br>(over 11 year<br>period) | 6.018                                                               | 3.625    | 2.804                                                             | 1.474    |

**eTable 5.** Readmissions in Switzerland and Scotland After an Initial Episode of Successful Conservative Management of Diverticulitis Stratified by a later Event of Emergency Surgery or Death

| Readmissions                          | Patients (%) without emergency surgery or death |            | Patients with emergency surgery or death at any readmission |           |
|---------------------------------------|-------------------------------------------------|------------|-------------------------------------------------------------|-----------|
|                                       | Switzerland                                     | Scotland   | Switzerland                                                 | Scotland  |
| 0                                     | 8779 (67%)                                      | 3302 (68%) | 0                                                           | 0         |
| 1                                     | 3499 (27%)                                      | 1054 (22%) | 575 (82%)                                                   | 175 (69%) |
| 2                                     | 698 (5%)                                        | 331 (7%)   | 96 (14%)                                                    | 53 (21%)  |
| 3                                     | 161 (1%)                                        | 98 (2%)    | 16 (2%)                                                     | 16 (6%)   |
| 4                                     | 29 (<1%)                                        | 47 (1%)    | 8 (1%)                                                      | 7 (3%)    |
| >4                                    | 12 (<1%)                                        | 42 (1%)    | 3 (<1%)                                                     | 4 (2%)    |
| Median Number of Readmissions (Range) | 0 (0-6)                                         | 0 (0-15)   | 1 (1-6)                                                     | 1 (1-7)   |

**eTable 6.** Marginal Model for Problematic Recurrence Leading to Death, in Patients After a First Conservatively Managed Episode of Complicated Diverticulitis in the Swiss and Scottish Health Care System

| <b>term</b>                                                  | <b>Estimate</b> | <b>95% CI for estimate</b> | <b>OR</b> | <b>95% CI of the OR</b> |
|--------------------------------------------------------------|-----------------|----------------------------|-----------|-------------------------|
| (Intercept)                                                  | -5.07           | -5.44;-4.69                | NA        | NA                      |
| hcs (Switzerland vs Scotland)                                | -0.43           | -0.80; -0.05               | 0.65      | 0.45; 0.95              |
| sex (male vs female)                                         | -0.23           | -0.55; 0.10                | 0.80      | 0.58; 1.10              |
| Hospital admission volume (<7500 admissions / year vs more)  | 0.24            | -0.34; 0.82                | 1.28      | 0.72; 2.28              |
| Hospital diverticulitis caseload (<100 cases / year vs more) | 0.30            | -0.17; 0.77                | 1.35      | 0.85; 2.16              |
| Deprivation at baseline (low vs high)                        | -0.13           | -0.53; 0.26                | 0.88      | 0.59; 1.30              |
| Median age at baseline (for 5 year age category)             | 0.37            | 0.31; 0.43                 | 1.45      | 1.37; 1.54              |
| Charleston Comorbidity Index at baseline                     | 0.15            | 0.10; 0.20                 | 1.17      | 1.11; 1.23              |

hcs health care system, vs versus CI Confidence Interval OR Odds ratio NA not applicable



**eTable 7a-d**

**a) Multiple logistic regression for problematic recurrence with Scotland instead of Switzerland as reference level, and including interaction terms.**

| <b>Effects: Full (multivariable) model for problematic recurrence, including interaction terms, with odds ratios and 95% confidence intervals</b> |           |               |                |
|---------------------------------------------------------------------------------------------------------------------------------------------------|-----------|---------------|----------------|
| <b>term</b>                                                                                                                                       | <b>OR</b> | <b>OR_low</b> | <b>OR_high</b> |
| Switzerland vs Scotland (large hospitals)                                                                                                         | 0.97      | 0.83          | 1.13           |
| Switzerland vs Scotland (small hospitals)                                                                                                         | 1.42      | 0.63          | 3.59           |
| Hospital size, small vs large (Scotland)                                                                                                          | 0.86      | 0.40          | 1.63           |
| Hospital size, small vs large (Switzerland)                                                                                                       | 1.26      | 0.30          | 5.18           |
| Male vs Female                                                                                                                                    | 0.87      | 0.76          | 0.99           |
| Low expertise vs High expertise                                                                                                                   | 1.06      | 0.85          | 1.30           |
| Deprivation yes vs no                                                                                                                             | 0.97      | 0.84          | 1.13           |
| Baseline age increase by 5 year (for cci=0)                                                                                                       | 1.00      | 0.98          | 1.02           |
| Per CCI unit increase (for the median age band)                                                                                                   | 0.91      | 0.75          | 1.25           |

**b) Model accounting for hospital clustering, with Scotland as reference level, and including interaction terms.**

| <b>Effects: Marginal model for problematic recurrence (including death), estimated via GEE, accounting for hospital clustering, and including interaction terms, reporting the odds ratios with their 95% confidence intervals</b> |           |               |                |
|------------------------------------------------------------------------------------------------------------------------------------------------------------------------------------------------------------------------------------|-----------|---------------|----------------|
| <b>term</b>                                                                                                                                                                                                                        | <b>OR</b> | <b>OR_low</b> | <b>OR_high</b> |
| Switzerland vs Scotland (large hospitals)                                                                                                                                                                                          | 0.97      | 0.80          | 1.17           |
| Switzerland vs Scotland (small hospitals)                                                                                                                                                                                          | 1.42      | 0.45          | 4.43           |
| Hospital size, small versus large (Scotland)                                                                                                                                                                                       | 0.86      | 0.33          | 2.21           |
| Hospital size, small versus large (Switzerland)                                                                                                                                                                                    | 1.26      | 0.18          | 8.38           |
| Male vs Female                                                                                                                                                                                                                     | 0.87      | 0.75          | 1.01           |
| Low expertise vs High expertise                                                                                                                                                                                                    | 1.06      | 0.79          | 1.41           |
| Deprivation yes vs no                                                                                                                                                                                                              | 0.97      | 0.82          | 1.15           |
| Baseline age increase by 5 year (for cci=0)                                                                                                                                                                                        | 1.00      | 0.97          | 1.03           |
| Per CCI unit increase (for the median age band)                                                                                                                                                                                    | 0.91      | 0.76          | 1.24           |

**c) Multiple logistic regression and GEE for recurrence with death, using Scotland as reference level, and including interaction terms.**

| <b>Effects: Full (multivariable) model for recurrence with death, with interaction terms, reporting odds ratios and 95% confidence intervals</b> |           |               |                |
|--------------------------------------------------------------------------------------------------------------------------------------------------|-----------|---------------|----------------|
| <b>term</b>                                                                                                                                      | <b>OR</b> | <b>OR_low</b> | <b>OR_high</b> |
| Switzerland vs Scotland (large hospitals)                                                                                                        | 0.65      | 0.47          | 0.92           |
| Switzerland vs Scotland (small hospitals)                                                                                                        | 0.77      | 0.20          | 3.92           |
| Hospital size, small versus large (Scotland)                                                                                                     | 1.11      | 0.32          | 2.91           |
| Hospital size, small versus large (Switzerland)                                                                                                  | 1.32      | 0.13          | 12.40          |
| Male vs Female                                                                                                                                   | 0.82      | 0.59          | 1.13           |
| Low expertise vs High expertise                                                                                                                  | 1.34      | 0.83          | 2.09           |
| Deprivation yes vs no                                                                                                                            | 0.87      | 0.59          | 1.24           |
| Baseline age increase by 5 year (for cci=0)                                                                                                      | 1.51      | 1.39          | 1.63           |
| Per CCI unit increase (for the median age band)                                                                                                  | 0.78      | 0.55          | 1.10           |

**d) Multiple logistic regression and GEE for recurrence with death, using Scotland as reference level, and including interaction terms accounting for hospital clustering.**

| <b>Effects: Marginal model for problematic recurrence with death, estimated via GEE, accounting for hospital clustering, and including interaction terms, reporting the odds ratios with their 95% confidence intervals</b> |           |               |                |
|-----------------------------------------------------------------------------------------------------------------------------------------------------------------------------------------------------------------------------|-----------|---------------|----------------|
| <b>term</b>                                                                                                                                                                                                                 | <b>OR</b> | <b>OR_low</b> | <b>OR_high</b> |
| Switzerland vs Scotland (large hospitals)                                                                                                                                                                                   | 0.65      | 0.44          | 0.97           |
| Switzerland vs Scotland (small hospitals)                                                                                                                                                                                   | 0.77      | 0.17          | 3.50           |
| Hospital size, small versus large (Scotland)                                                                                                                                                                                | 1.11      | 0.40          | 3.06           |
| Hospital size, small versus large (Switzerland)                                                                                                                                                                             | 1.32      | 0.16          | 11.05          |
| Male vs Female                                                                                                                                                                                                              | 0.82      | 0.59          | 1.13           |
| Low expertise vs High expertise                                                                                                                                                                                             | 1.34      | 0.84          | 2.14           |
| Deprivation yes vs no                                                                                                                                                                                                       | 0.87      | 0.58          | 1.29           |
| Baseline age increase by 5 year (for cci=0)                                                                                                                                                                                 | 1.51      | 1.41          | 1.61           |
| Per CCI unit increase (for the median age band)                                                                                                                                                                             | 0.97      | 0.66          | 1.09           |
